# Supplementary material for: A systematic review of validated screening tools for anxiety disorders and PTSD in low to middle income countries
Source: BMC Psychiatry. 2020 Jun 30;20:338. doi: 10.1186/s12888-020-02753-3 (PMC7325104; doi:10.1186/s12888-020-02753-3)
Supplement: Supplementary file 1 — Additional file 1. Appendix [file 12888_2020_2753_MOESM1_ESM.xlsx]

## Sheet: Sheet1
Author (year)	Title	Screening tool/disorder	No. Questions	Language	Gold Standard	Subregion	Country	Setting Level 1	Setting Level 2	Population	Population Level 1	Population Level 2	Study Quality	No. Participants	Prevalence (%)	Screening Tool Administrator	Gold Standard	DSM Version	GS Administrator	AUC	Cut-Off Score ( ≥)	Sensitivity (%)	Specificity (%)
Ali et al (1998)	A comparative review of two screening instruments: the Aga Khan University Anxiety and Depression Scale and the self reporting questionnaire	AKUADS/GAD and MDD	25	Urdu	Interview	Asia South	Pakistan	urban	not specified	Residents aged 16-60 in Karachi squatter settlement	ages 16-60	living in Karachi squatter settlement	unblinded	487	x	community health workers	Interview	DSM 3	Psychiatrist	x	19	74	81
Mbewe et al (2013)	A Primary Healthcare Screening Tool to Identify Depression Anxiety Disorders among People with Epilepsy in Zambia and	self-made/Anxiety and depression	10	Nyanja and Bemba	Interview	Africa East	Zambia	not specified	clinical	Adults with epilepsy	adult	epilepsy	good	575	53.7	BSc-trained psychiatric clinical officer	Interview	DSM 4	psychiatric clinical officer	x	17	56.5	68.1
Liu et al (2008)	A short DSM-IV screening scale to detect posttraumatic stress disorder after a natural disaster in a Chinese population	PTSD screening tool/PTSD	7	Mandarin	DSM-IV PTSD criteria	Asia East	China	not specified	community-based	Survivors of a flood aged 16+	adults and adolescents: ages 16+	survivors of a flood	unblinded	27267	9.5	research assistants	DSM-IV PTSD criteria	DSM 4	not specified	0.858	3	87.9	97.9
de Lima Osório et al (2007)	A study of the discriminative validity of a screening tool (MINI-SPIN) for social anxiety disorder applied to Brazilian university students	MINI-SPIN/Social anxiety disorder	3	Portuguese	SCID	America South	Brazil	urban	university	University students	not specified	university students	fair	2320	10.4	self reported	SCID	DSM 4	mental health professional	0.81	6	94	46
Başoglu et al (2001)	A study of the validity of a screening instrument for traumatic stress in earthquake survivors in Turkey	TSSC/PTSD	23	Turkish	CAPS	Asia West	Turkey	urban	clinical	Survivors of 1999 August earthquake aged 16-70	Age 16-70	survivors of 1999 August earthquake	acceptable	130	49	psychologist or psychologist	CAPS	DSM 4	psychiatrist or psychologist	x	2	76	73
Abiodun et al (1994)	A validity study of the Hospital Anxiety and Depression Scale in general hospital units and a community sample in Nigeria	HADS/Anxiety and Depression	not specified	English and Yoruba	Interview	Africa West	Nigeria	urban	community and clinical-based	Adult patients in non-psychiatric wards and community	not specified	various non-psychiatric wards in hospital, as well as community	unblinded (unconfirmed)	1078	Medical/Surgical: 7.2; Gynaecology: 9.4; Ante-natal: 5.8; Community: 7.2	research assistants	Interview	ICD 9	psychiatrist	x	8	87.5	90.6
Russell et al (2013)	ADad 2: the validation of the Screen for Child Anxiety Related Emotional Disorders for Anxiety Disorders among adolescents in a rural community population in India	SCARED/anxiety	41	Malayalam/English	K-SADS-PL	Asia South	India	unclear	community-based	Adolescents aged 11-19	adolescents aged 11-19	not specified	unblinded (unconfirmed)	500	x	developmental therapists, special educators, speech therapists, clincial psychologist, and pediatrician	K-SADS-PL	DSM 4	developmental therapists, special educators, speech therapists, clincial psychologist, and pediatrician	0.9	21	84.6	87.36
Sawaya et al (2016)	Adaptation and initial validation of the Patient Health Questionnaire-9 (PHQ-9) and the Generalized Anxiety Disorder-7 Questionnaire (GAD-7) in an Arabic speaking Lebanese psychiatric outpatient sample	GAD-7/anxiety	7	Arabic	Interview	Asia West	Lebanon	urban	clinical	Adult psychiatric outpatients	adults	psychiatric outpatients	acceptable	176	x	self-reported	Interview	DSM 4	psychiatrist/clinical psychologist	0.57	10	57	53
Sheng et al (2010)	Better detection of non-psychotic mental disorders by case description method in China	HADS-A/anxiety	14	Chinese	MINI	Asia East	China	urban	clinical	Adult psychiatric outpatients	adults	outpatients at psychiatric hospital	unblinded	70	25.5	self-reported	MINI	DSM 4	researcher	0.805	6	86	79
Liu et al (2007)	Brief screening instrument of posttraumatic stress disorder for children and adolescents 7-15 years of age	PTSD screening tool/PTSD	7	Mandarin	DSM-IV PTSD criteria	Asia East	China	not specified	community-based	Child survivors of a flood aged 7-15	youth: ages 7-15	child survivors of a flood	unblinded	6073	4.6	research assistants	DSM-IV PTSD criteria	DSM 4	not specified	x	3	96.9	99
Myer et al (2008)	Common mental disorders among HIV-infected individuals in South Africa: prevalence, predictors, and validation of brief psychiatric rating scales	HTQ/PTSD	30	Afrikaans and Xhosa	MINI	Africa South	South Africa	urban	clincial	HIV-positive adults	adults	HIV-positive	good	465	5	trained interviewers	MINI	DSM 4	research nurse	0.74	62	74	70
van Heyningen et al (2018)	Comparison of mental health screening tools for detecting antenatal depression and anxiety disorders in South African women	EPDS/anxiety	10	English and Xhosa	MINI	Africa South	South Africa	urban	clinical	Adult women in the antenatal period	adults	women in the antenatal period	unblinded (unconfirmed)	376	23	research assistant	MINI	DSM 4	Counselor	0.69	5	67	59
van Heyningen et al (2018)	Comparison of mental health screening tools for detecting antenatal depression and anxiety disorders in South African women	K10/anxiety	10	English and Xhosa	MINI	Africa South	South Africa	urban	clinical	Adult women in the antenatal period	adults	women in the antenatal period	unblinded (unconfirmed)	376	23	research assistant	MINI	DSM 4	Counselor	0.77	11	76	70
van Heyningen et al (2018)	Comparison of mental health screening tools for detecting antenatal depression and anxiety disorders in South African women	K6/anxiety	6	English and Xhosa	MINI	Africa South	South Africa	urban	clinical	Adult women in the antenatal period	adults	women in the antenatal period	unblinded (unconfirmed)	376	23	research assistant	MINI	DSM 4	Counselor	0.77	8	69	76
van Heyningen et al (2018)	Comparison of mental health screening tools for detecting antenatal depression and anxiety disorders in South African women	GAD-2/anxiety	2	English and Xhosa	MINI	Africa South	South Africa	urban	clinical	Adult women in the antenatal period	adults	women in the antenatal period	unblinded (unconfirmed)	376	23	research assistant	MINI	DSM 4	Counselor	0.73	2	64	74
Chaturvedi et al (1994)	Detection of anxiety and depression in cancer patients	HADS/anxiety	14	English and Kannada	Interview	Asia South	India	not specified	clinical	Cancer patients of all ages	all ages	cancer patients	unblinded (unconfirmed)	70	not specified	self-reported	Interview	DSM 3	Psychiatrist	x	7	87	79
Zong et al (2015)	Diagnostic validity of the generalized anxiety disorder - 7 (GAD-7) among pregnant women	GAD-7/GAD	7	Spanish	CIDI	South America	Peru	urban	clinical	Pregnant women aged 18-49 who speak Spanish	adults	pregnant women 18-49yo who speak Spanish	unblinded (unconfirmed)	946	33.3	not specified	CIDI	DSM 4	research psychologists	0.75	7	73.3	67.3
Seedat et al (2007)	Measuring anxiety in patients with schizophrenia	STAI/anxiety	40	English and Afrikaans	MINI	Africa South	South Africa	urban	clinical	Adult schizophrenic patients	adults	schizophrenic patients	unblinded	70	22.9	study clinician	MINI	DSM 4	study clinician	x	40	75	48.1
Seedat et al (2007)	Measuring anxiety in patients with schizophrenia	HADS-A/anxiety	7	English and Afrikaans	MINI	Africa South	South Africa	urban	clinical	Adult schizophrenic patients	adults	schizophrenic patients	unblinded	70	22.9	study clinician	MINI	DSM 4	study clinician	x	11	37.5	72.2
Seedat et al (2007)	Measuring anxiety in patients with schizophrenia	HAM-A/anxiety	14	English and Afrikaans	MINI	Africa South	South Africa	urban	clinical	Adult schizophrenic patients	adults	schizophrenic patients	unblinded	70	22.9	study clinician	MINI	DSM 4	study clinician	x	22	31.3	90.7
Yazici et al (2018)	Perinatal Anxiety Screening Scale validiy and reliability study in Turkish (PASS-TR validity and reliability)	PASS/anxiety	31	Turkish	SCID-1	Asia West	Turkey	urban	clinical	Adult women in perinatal period	adults	women in perinatal period	unblinded (unconfirmed)	312	19.2	Psychiatrist and self-reported	SCID-1	DSM 4	Psychiatrist	0.94	16	95	84
Ventevogel et al (2007)	Properties of the Hopkins Symptom Checklist-25 (HSCL-25) and the Self-Reporting Questionnaire (SRQ-20) as screening instruments used in primary care in Afghanistan	HSCL/anxiety	25	Pashto	PAS	Asia South	Afghanistan	rural	clinical	Clinic patients aged 15+	age 15+	Patients at the clinics used	good	116	24.1	research assistant	PAS	not specified	Psychiatrist	0.61	2	75	43
Ventevogel et al (2007)	Properties of the Hopkins Symptom Checklist-25 (HSCL-25) and the Self-Reporting Questionnaire (SRQ-20) as screening instruments used in primary care in Afghanistan	HSCL/depression and anxiety	25	Pashto	PAS	Asia South	Afghanistan	rural	clinical	Clinic patients aged 15+	age 15+	Patients at the clinics used	good	116	24.1	research assistant	PAS	not specified	Psychiatrist	0.61	2	69	67
Thapa et al (2005)	Psychological distress among displaced persons during an armed conflict in Nepal	HSCL-25/anxiety	25	Nepali	CIDI	Asia South	Nepal	urban	household	Adults residing in conflict areas	adults	conflict areas	unblinded	290	80.7	psychologists/university students	CIDI	DSM 4	trained physician	0.76	1.75	77	58
Thapa et al (2005)	Psychological distress among displaced persons during an armed conflict in Nepal	CL/PTSD	17	Nepali	CIDI	Asia South	Nepal	urban	household	Adults residing in conflict areas	adults	conflict areas	unblinded	290	53.4	psychologists/university students	CIDI	DSM 4	trained physician	0.81	50	80	80
Gormez et al (2017)	Psychometric properties of the Turkish version of the Revised Child Anxietyand Depression Scale—Child Version in a clinical sample	RCADS-GAD scale/GAD	47	Turkish	K-SADS	Asia West	Turkey	urban	clinical	Child psychiatry outpatients aged 8-17	youth: ages 8-17	child psychiatry outpatients	unblinded (unconfirmed)	483	not specified	self-reported	K-SADS	DSM 4	psychiatrist	x	7.5	70	71
Yang et al (2014)	Reliability and validity of a Chinese version of the HADS for screening depression and anxiety in psycho-cardiological outpatients	HADS-A/anxiety	7	Chinese	MINI	Asia East	China	urban	clinical	Adult cardiac outpatients	adults	cardiac outpatients	unblinded (unconfirmed)	100	15	cardiologist	MINI	DSM 4	cardiologist	0.81	6	81.6	75.8
Geibel et al (2016)	Reliability and Validity of an Interviewer Administered Adaptation of the Youth Self Report for Mental Health Screening of Vulnerable Young People in Ethiopia	YSR/anxiety and depression	105	Amharic	Interview	Africa East	Ethiopia	urban	community-based	Vulnerable teens assisted by two aid organizations	youth, age 15-18	vulnerable teens receiving services from two aid organizations	good	134	64.6	trained and experienced nurses	Interview	DSM 4	Ethiopian licensed junior psychiatrists	0.729	6.5	75	63.1
Hariz et al (2013)	Reliability and validity of the Arabic Screen for Child Anxiety Related Emotional Disorders (SCARED) in a clinical sample	SCARED-C/anxiety	41	Arabic	Interview	Asia West	Lebanon	urban	clinical	Child and adolescent psychiatric patients	children: ages 9-17	child and adolescent psychiatric patients	good	82	40.2	self-reported	Interview	DSM 4	psychiatrist	0.63	26	66	56
Hariz et al (2013)	Reliability and validity of the Arabic Screen for Child Anxiety Related Emotional Disorders (SCARED) in a clinical sample	SCARED-P/anxiety	41	Arabic	Interview	Asia West	Lebanon	urban	clinical	Child and adolescent psychiatric patients	children: ages 9-17	child and adolescent psychiatric patients	good	82	x	self-reported	Interview	DSM 4	psychiatrist	0.7	24	67	55
Goldberg et al (2017)	Screening for anxiety, depression, and anxious depression in primary care: A field study for ICD-11 PHC	PHC/current anxiety	10 (anxiety scale had 5)	Portugese, Urdu, Spanish, Chinese	CIS-R	South America, Asia South, Asia East, Central America	Brazil, Pakistan, China, Mexico	urban	clinical	Primary care patients	not specified	primary care patients who were believed to be psychologically distressed	fair	1488 (all countries)	Brazil: 26.5; Pakistan: 13; China: 18.9; Mexico: 23	self-reported	CIS-R	ICD 11	research assistant	0.77	3	75	68
Silove et al (2007)	Screening for depression and PTSD in a Cambodian population unaffected by war: comparing the Hopkins Symptom Checklist and Harvard Trauma Questionnaire with the structured clinical interview	HTQ/PTSD	16	Khmer	SCID	Asia South East	Thailand	not specified	community-based	Cambodian population in Thailand	adults	Cambodian population in Thailand; unexposed to war	good	118	20.3	self-reported	SCID	DSM 4	psychiatrist/clinical psychologist	0.71	2	63	61
Tran et al (2019)	Screening for depressive and anxiety disorders among adolescents in Indonesia: Formal validation of the centre for epidemiologic studies depression scale – revised and the Kessler psychological distress scale	K-10/anxiety	10	Indonesian	MINI-KID	Asia South East	Indonesia	urban	school	Adolescents age 16-18	adolescents	age 16-18	unblinded (unconfirmed)	196	x	self-reported	MINI-KID	DSM 4	Psychiatrist	0.82	18	87.1	70.9
Tran et al (2019)	Screening for depressive and anxiety disorders among adolescents in Indonesia: Formal validation of the centre for epidemiologic studies depression scale – revised and the Kessler psychological distress scale	K-6/anxiety	6	Indonesian	MINI-KID	Asia South East	Indonesia	urban	school	Adolescents age 16-19	adolescents	age 16-18	unblinded (unconfirmed)	196	x	self-reported	MINI-KID	DSM 4	Psychiatrist	0.8	12	83.9	73.3
Martin et al (2009)	Screening for HIV-related PTSD: sensitivity and specificity of the 17-item Posttraumatic Stress Diagnostic Scale (PDS) in identifying HIV-related PTSD among a South African sample	PDS/PTSD	17	English, Afrikaans, Xhosa	CIDI	Africa South	South Africa	not specified	clinical	HIV-positive adults	adults	HIV-positive	unblinded	85	x	self-reported	CIDI	DSM 4	not specified	0.74	15	68.6	65
Senturk et al (2007)	Screening for mental disorders in leprosy patients: Comparing the internal consistency and screening properties of HADS and GHQ-12	GHQ-12/anxiety	12	Turkish	CIDI-PHCV	Asia West	Turkey	urban	clinical	Adult leprosy patients	adults	leprosy patients	unblinded (unconfirmed)	65	12.3	psychiatrist	CIDI-PHCV	ICD 10	psychiatrist	0.69	5	71	57
Senturk et al (2007)	Screening for mental disorders in leprosy patients: Comparing the internal consistency and screening properties of HADS and GHQ-13	HADS/anxiety	7	Turkish	CIDI-PHCV	Asia West	Turkey	urban	clinical	Adult leprosy patients	adults	leprosy patients	unblinded (unconfirmed)	65	x	psychiatrist	CIDI-PHCV	ICD 11	psychiatrist	0.75	11	66	58
Tran et al (2011)	Screening for perinatal common mental disorders in women in the north of Vietnam: a comparison of three psychometric instruments	Zung SAS/anxiety	20	Vietnamese	Interview	Asia South East	Vietnam	rural and urban	clinical and household	Adult perinatal women	adults	Perinatal women	good	364	11.8	trained health researcher	Interview	DSM 4	Psychiatrist	0.79	38	67.9	75.3
Odenwald et al (2007)	Screening for Post-Traumatic Stress Disorder among Somali ex-combatants: A validation study	PDS/PTSD	not specified	Somali	CIDI	Africa East	Somalia	rural	community-based	Patients with trauma exposure	not specified	trauma exposure	good	135 (62 for CIDI)	16.1	local interviewers with training	CIDI	DSM 4	clinical psychologist	0.874	14	90	79
Oruc et al (2008)	Screening for PTSD and depression in Bosnia and Herzegovina: validating the Harvard Trauma Questionnaire and the Hopkins Symptom Checklist	HTQ/(PTSD)	30	Bosnian/Croat	SCID	Europe Southern	Bosnia and Herzgovina	not specified	clinical	Adults enrolled in primary care clinic	adults	enrolled in primary care clinic	very good	180	26	general practitioner or psychologist	SCID	DSM 4	psychiatrist	0.98	2.06	99.9	93.9
Wang et al (2017)	The development and validation of Huaxi emotional-distress index (HEI): A Chinese questionnaire for screening depression and anxiety in non-psychiatric clinical settings	HEI/Depression and Anxiety	9	Chinese	MINI	Asia East	China	urban	hospital	Hospitalized patients aged 15+	age 15+	hospitalized patients	unblinded (unconfirmed)	763	7.11	research assistant	MINI	DSM 4	Psychiatrist	0.88	11	88	76.6
Andersen et al (2011)	The psychometric properties of the K10 and K6 scales in screening for mood and anxiety disorders in the South African Stress and Health study	K-10/Anxiety or Depression	10	Afrikaans, Zulu, Xhosa, Northern Sotho, Tswana	CIDI	Africa South	South Africa	nationwide	household	Adults	adults	any	unblinded	4077	x	not specified	CIDI	DSM 4	lay interviewer	0.73	16	70	67
Andersen et al (2011)	The psychometric properties of the K10 and K6 scales in screening for mood and anxiety disorders in the South African Stress and Health study	K-6/Anxiety or Depression	6	Afrikaans, Zulu, Xhosa, Northern Sotho, Tswana	CIDI	Africa South	South Africa	nationwide	household	Adults	adults	any	unblinded	4077	x	not specified	CIDI	DSM 4	lay interviewer	0.72	10	70	62
Ibrahim et al (2018)	The validity of Posttraumatic Stress Disorder Checklist for DSM-5 (PCL-5) as screening instrument with Kurdish and Arab displaced populations living in the Kurdistan region of Iraq	PCL-5/PTSD	5	Kurdish and Arabic	DSM 5 interview	Asia West	Iraq	not specified	refugee camps	Adults living in a camp for displaced people in Iraq	adults	living in a camp for displaced people in Iraq	good	206	37.75	local interviewer	DSM 5 interview	DSM 5	clinical psychologist	0.82	23	82	70
Hollander et al (2007)	The validity of screening instruments for posttraumatic stress disorder, depression, and other anxiety symptoms in Tajikistan (Journal of Nervous and Mental Disease (2007) 195, (955-958))	HTQ-R/PTSD	30/25	Russian	Interview	Asia Central	Tajikistan	urban	clinical	Adult patients at outpatient clinics	adults	patients at outpatient clinics	acceptable	75	x	self-reported with assistance from psychiatrists	Interview	DSM 4	psychiatrist	x	1.73	97	65
Hollander et al (2007)	The validity of screening instruments for posttraumatic stress disorder, depression, and other anxiety symptoms in Tajikistan (Journal of Nervous and Mental Disease (2007) 195, (955-958))	HSCL-25/anxiety	25	Russian	Interview	Asia Central	Tajikistan	urban	clinical	Adult patients at outpatient clinics	adults	patients at outpatient clinics	acceptable	75	x	self-reported with assistance from psychiatrists	Interview	DSM 4	psychiatrist	x	1.6	84	60
Ertl et al (2011)	Validation of a mental health assessment in an african conflict population	PDS/PTSD	17	Luo	CAPS	Africa East	Uganda	rural	community-based	Adults and adolescents aged 12-25	adult and adolescent: ages 12-25		good	68	32.4	local screeneers	CAPS	DSM 4	clinical psychologist	0.79	16	82	70
Kohrt et al (2011)	Validation of cross-cultural child mental health and psychosocial research instruments: adapting the Depression Self-Rating Scale and Child PTSD Symptom Scale in Nepal.	CPSS/PTSD	17	Nepali	K-SADS	Asia South	Nepal	urban	school	Adolescents aged 11-14	youth	ages 11-14	good	162	6.4	research assistants	K-SADS	DSM 4	Psychosocial counselor	0.77	20	68	73
Housen et al (2018)	Validation of mental health screening instruments in the Kashmir Valley, India	HSCL-25/anxiety/not enough participants to calculate data for HTQ	25	Kashmiri	MINI	Asia South	India	not specified	community	Adult general medical outpatients	adults	general medical outpatients	good	290	3.5	clinical psychologists	MINI	DSM 4 and ICD 10	psychiatrist	0.81	1.75	73	81
Chibanda et al (2016)	Validation of screening tools for depression and anxiety disorders in a primary care population with high HIV prevalence in Zimbabwe	GAD-7/GAD	7	Shona	SCID	Africa East	Zimbabwe	urban	clinical	Adults except pregnant women	adults	excluded pregnant women	good	264	3	research assistants, LHWs and psychiatrists	SCID	DSM 4	psychiatrist	0.9	10	89	73
Makanjuola et al (2014)	Validation of short screening tools for common mental disorders in Nigerian general practices	GHQ-12/anxiety	12	Yoruba	CIDI	Africa West	Nigeria	not specified	clinical	Adult patients of general practices	adults	patients of general practices	unblinded	1590	x	lay interviewers	CIDI	DSM 4	trained interviewers	0.61	3	59	63.3
Makanjuola et al (2014)	Validation of short screening tools for common mental disorders in Nigerian general practices	K6/anxiety	6	Yoruba	CIDI	Africa West	Nigeria	not specified	clinical	Adult patients of general practices	adults	patients of general practices	unblinded	1590	x	lay interviewers	CIDI	DSM 4	trained interviewers	0.58	4	65	55
Mahfoud et al (2011)	Validation of the Arab Youth Mental Health scale as a screening tool for depression/anxiety in Lebanese children	AYMH/Anxiety and Depression	21	Arabic	Interview	Asia West	Lebanon	urban	community-based	Socioeconomically disadvantaged children aged 10-14	children: ages 10-14	socioeconomically disadvantaged kids	good	153	17.6	research assistants	Interview	DSM 4	psychiatrist	0.71	39	63	79
Tran et al (2013)	Validation of the depression anxiety stress scales (DASS) 21 as a screening instrument for depression and anxiety in a rural community-based cohort of northern Vietnamese women	DASS-A/anxiety	21	Vietnamese	SCID	Asia South East	Vietnam	rural	clinical	Adult perinatal women	adults	Perinatal women	good	221	10.9	trained health researcher	SCID	DSM 4	Psychiatrist	0.806	10	79.2	67
Sidik et al (2012)	Validation of the gad-7 (Malay version) among women attending a primary care clinic in Malaysia	GAD-7/anxiety	7	Malay	CIDI	Asia South East	Malaysia	not specified	clinical	Adult females	adults	female	good	895	7.8	self-reported	CIDI	DSM 4	primary investigator	x	8	76	94
Tong et al (2016)	Validation of the Generalized Anxiety Disorder-7 (GAD-7) among Chinese people with epilepsy	GAD-7/Generalized anxiety	7	Chinese	MINI	Asia East	China	urban	clinical	Adults with epilepsy who were Chinese citizens	adults	With epilepsy, Chinese citizens, completed primary school	unblinded	213	23.5	psychiatrist	MINI	DSM 4	Psychiatrist	0.974	6	94	91.4
Malasi et al (1991)	Validation of the Hospital Anxiety and Depression Scale in Arab patients	HADS/anxiety	14	Arabic	Interview	Asia West	Kuwait	urban	clinical	Adult psychiatric outpatients and controls	adults	psych outpatients and controls	acceptable	135	x	self-reported	Interview	DSM 3	Psychiatrist		13	45	47
Namazi et al (2013)	Validation of the Iranian Version of the University of California at Los Angeles Posttraumatic Stress Disorder Index for DSM-IV-R	UCLA PTSD (PTSD)	20 for child version, 21 for adult version	Farsi	Interview	Asia South	Iran	rural	community-based	Children aged 7-12 after earthquake	children	7-12y/o, given after earthquake	unblinded (unconfirmed)	50	56	not specified	Interview	4-R	psychiatrist	x	38	96	50
Ventevogel et al (2014)	Validation of the Kirundi versions of brief self-rating scales for common mental disorders among children in Burundi	CPSS/PTSD	17/41	Kirundi	K-SADS-PL	Africa East	Burundi	rural	school	Children aged 10-15	children	ages 10-15	good	65	23	research assistant	K-SADS-PL	DSM 4	Psychiatrist	0.78	26	71	83
Yahya et al (2015)	Validation of the Malay version of hospital anxiety and depression scale (HADS) in hospital Universiti Sains Malaysia	HDRS/AUC and Cut-off: Anxiety and Depression; Sens/Spec: Anxiety	14	Malay	DSM-IV	Asia South East	Malaysia	not specified	clinical	Patients with existing psychiatric disorder and controls	not specified	patients having existing psych disorder/controls were patient and staff family members	unblinded (unconfirmed)	120	x	physician	DSM-IV	DSM 4	physician	0.917	8	90	86.2
Kohrt et al (2003)	Validation of the Nepali version of beck anxiety inventory	BAI/anxiety	21	Nepali	DSM-IV criteria	Asia South	Nepal	rural	clinical/community-based	Adults with psychiatric illness and controls	adults	diagnosed with psychiatric illness and undiagnosed community sample	acceptable	363	Clinical: 21.2, Community: 5.4	research assistants	DSM-IV criteria	DSM 4	psychiatrist	x	14	91	89
Verhey et al (2018)	Validation of the Posttraumatic Stress Disorder Checklist—5 (PCL-5) in a primary care population with high HIV prevalence in Zimbabwe	PCL-5/PTSD	20	Shona	CAPS-5	Africa East	Zimbabwe	urban	clinical	Adults except perinatal women	adults	excluding perinatal women	very good	204	19.6	research assistant	CAPS-5	DSM 5	Physician	0.78	33	74.5	70.6
van der Westhuizen (2016)	Validation of the Self Reporting Questionnaire 20-Item (SRQ-20) for Use in a Low- and Middle-Income Country Emergency Centre Setting	SRQ-20 (Anxiety/Depression/suicidality)-FEMALE	20	English	MINI	Africa South	South Africa	urban	clinical	Adults with assault-related injury or accidents	adult	assault-related injury or accidents	unblinded (unconfirmed)	200	x	field workers	MINI	ICD-10, 4	Not specified	0.87	5	83.3	76
Marsay et al (2017)	Validation of the Whooley questions for antenatal depression and anxiety among low-income women in urban South Africa	EPDS-anxiety subscale/trauma and anxiety	10	English	NetSCID	Africa South	South Africa	urban	clinical	Adult women pregnant for 22-28 weeks	adult	pregnant 22-28wks	unblinded (unconfirmed)	145	14.5	principal investigator, psychiatrist	NetSCID	DSM 5	principal investigator, psychiatrist	x	7	54.8	81.6
Tran et al (2012)	Validation of three psychometric instruments for screening for perinatal common mental disorders in men in the north of Vietnam	Zung SAS/anxiety	20	Vietnamese	Interview	Asia South East	Vietnam	rural and urban	clinical and household	Men who are partners of pregnant or perinatal women	adults	Men who are partners of pregnant women or who have recently given birth	good	231	5.2	trained health researcher	Interview	DSM 4	Psychiatrist	0.775	36	70.7	79
Kaaya et al (2002)	Validity of the Hopkins Symptom Checklist-25 amongst HIVpositive pregnant women in Tanzania	HSCL-25/Anxiety and Depression	25	Kishwahili	SCID	Africa East	Tanzania	urban	clinical	Pregnant women with HIV	not specified	pregnant women with HIV+	good	903 (100 for SCID)	3.3	Research assistants	SCID	DSM 4	indigenous psychiatrists	0.86	1.06	89	80
Spies et al (2009)	Validity of the K-10 in detecting DSM-IV-defined depression and anxietydisorders among HIV-infected individuals	K10/GAD	10	Xhosa/Afrikaans/English	MINI	Africa South	South Africa	unclear	clinical	HIV-positive adults	adults	HIV-positive	unblinded (unconfirmed)	429	18.4	self-reported	MINI	DSM 4	not specified	0.78	30	72	80
Spies et al (2009)	Validity of the K-10 in detecting DSM-IV-defined depression and anxietydisorders among HIV-infected individuals	K-10/Social anxiety	10	Xhosa/Afrikaans/English	MINI	Africa South	South Africa	unclear	clinical	HIV-positive adults	adults	HIV-positive	unblinded (unconfirmed)	429	12.3	self-reported	MINI	DSM 5	not specified	0.9	30	92	80
Spies et al (2009)	Validity of the K-10 in detecting DSM-IV-defined depression and anxietydisorders among HIV-infected individuals	K-10/Panic disorder	10	Xhosa/Afrikaans/English	MINI	Africa South	South Africa	unclear	clinical	HIV-positive adults	adults	HIV-positive	unblinded (unconfirmed)	429	15.3	self-reported	MINI	DSM 6	not specified	0.77	28	76	73
Spies et al (2009)	Validity of the K-10 in detecting DSM-IV-defined depression and anxietydisorders among HIV-infected individuals	K-10/Agoraphobia	10	Xhosa/Afrikaans/English	MINI	Africa South	South Africa	unclear	clinical	HIV-positive adults	adults	HIV-positive	unblinded (unconfirmed)	429	18.4	self-reported	MINI	DSM 7	not specified	0.69	26	65	67
Spies et al (2009)	Validity of the K-10 in detecting DSM-IV-defined depression and anxietydisorders among HIV-infected individuals	K-10/PTSD	10	Xhosa/Afrikaans/English	MINI	Africa South	South Africa	unclear	clinical	HIV-positive adults	adults	HIV-positive	unblinded (unconfirmed)	429	21.5	self-reported	MINI	DSM 8	not specified	0.77	29	75	78
Spies et al (2009)	Validity of the Kessler 10 (K-10) in detecting DSM-IV defined mood and anxietydisorders among pregnant women	K-10/GAD	10	not specified but likely English	MINI	Africa South	South Africa	not specified	clinical	HIV-positive adults	adults	HIV +	unblinded (unconfirmed)	429	18.4	self-reported	MINI	not specified	not specified	0.78	30	72	80
Spies et al (2009)	Validity of the Kessler 10 (K-10) in detecting DSM-IV defined mood and anxietydisorders among pregnant women	K-10/PTSD	10	not specified but likely English	MINI	Africa South	South Africa	not specified	clinical	HIV-positive adults	adults	HIV +	unblinded (unconfirmed)	429	21.5	self-reported	MINI	not specified	not specified	0.77	29	75	78
Gelaye et al (2017)	Validity of the posttraumatic stress disorders (PTSD) checklist in pregnant women	PCL-C/PTSD	17	Spanish	CAPS	South America	Peru	urban	clinical	Perinatal women	not specified	Perinatal women	very good	3289	3	clinician	CAPS	DSM 4	not specified	0.75	26	86	63
Ahmadi (2020)	PsychometricPropertiesof PersianVersionof PatientHealth Questionnaires-4(PHQ-4)inCoronaryHeartDiseasePatients	PHQ-4/depresion+anxiety	4	Farsi	SCID	Asia South	Iran	urban	hospital	Adults with coronary heart disease	adults	Coronary heart disease patients	unblinded (unconfirmed)	279	not specified	self-administered/researcher (when patient unable to fill out on their own)	SCID	DSM 5	trained professional familiar with diagnostic criteria of DSM-5 disorders	0.94	7	86	90
Ahmadi (2020)	PsychometricPropertiesof PersianVersionof PatientHealth Questionnaires-4(PHQ-4)inCoronaryHeartDiseasePatients	PHQ-4/anxiety	4	Farsi	SCID	Asia South	Iran	urban	hospital	Adults with coronary heart disease	adults	Coronary heart disease patients	unblinded (unconfirmed)	279	not specified	self-administered/researcher (when patient unable to fill out on their own)	SCID	DSM 5	trained professional familiar with diagnostic criteria of DSM-5 disorders	0.94	7	80	94
Saal (2019)	Evaluation of the Beck Anxiety Inventory in predicting generalised anxiety disorder among individuals seeking HIV testing in the Western Cape province, South Africa	Beck Anxiety Inventory/GAD	21	English	SCID	Africa South	South Africa	urban	HIV testing sites	Adults undergoing HIV testing	adults	Undergoing HIV testing	unblinded (unconfirmed)	500	3.4	not specified	SCID	DSM 5	not specified	0.86	21.5	82	80
